# Supplementary material
Source: MDPI journal article supplement (https://www.mdpi.com/2073-4352/1/4/229)
Supplement: s1 [file s1]

 
data_k09193twin 
 
_audit_creation_method            SHELXL-97 
_chemical_name_systematic 
; 
 ? 
; 
_chemical_name_common             ? 
_chemical_melting_point           ? 
_chemical_formula_moiety          'C22 H23 N O5' 
_chemical_formula_sum 
 'C22 H23 N O5' 
_chemical_formula_weight          381.41 
 
loop_ 
 _atom_type_symbol 
 _atom_type_description 
 _atom_type_scat_dispersion_real 
 _atom_type_scat_dispersion_imag 
 _atom_type_scat_source 
 'C'  'C'   0.0033   0.0016 
 'International Tables Vol C Tables 4.2.6.8 and 6.1.1.4' 
 'H'  'H'   0.0000   0.0000 
 'International Tables Vol C Tables 4.2.6.8 and 6.1.1.4' 
 'N'  'N'   0.0061   0.0033 
 'International Tables Vol C Tables 4.2.6.8 and 6.1.1.4' 
 'O'  'O'   0.0106   0.0060 
 'International Tables Vol C Tables 4.2.6.8 and 6.1.1.4' 
 
_symmetry_cell_setting            'Monoclinic'
_symmetry_space_group_name_H-M    'P 21/c' 
_symmetry_space_group_name_Hall    '-P 2ybc' 
 
loop_ 
 _symmetry_equiv_pos_as_xyz 
 'x, y, z' 
 '-x, y+1/2, -z+1/2' 
 '-x, -y, -z' 
 'x, -y-1/2, z-1/2' 
 
_cell_length_a                    20.9410(11) 
_cell_length_b                    8.7523(5) 
_cell_length_c                    21.2291(9) 
_cell_angle_alpha                 90.00 
_cell_angle_beta                  93.529(3) 
_cell_angle_gamma                 90.00 
_cell_volume                      3883.5(3) 
_cell_formula_units_Z             8 
_cell_measurement_temperature     150(1) 
_cell_measurement_reflns_used     6659
_cell_measurement_theta_min       2.7
_cell_measurement_theta_max       25.1 
 
_exptl_crystal_description        'needle' 
_exptl_crystal_colour             'colourless' 
_exptl_crystal_size_max           0.36 
_exptl_crystal_size_mid           0.22 
_exptl_crystal_size_min           0.22 
_exptl_crystal_density_meas       ? 
_exptl_crystal_density_diffrn     1.305 
_exptl_crystal_density_method     'not measured' 
_exptl_crystal_F_000              1616 
_exptl_absorpt_coefficient_mu     0.093 
# Absorption correction 

_exptl_absorpt_correction_type 'multi-scan' 
_exptl_absorpt_correction_T_min  0.701
_exptl_absorpt_correction_T_max  0.990
_exptl_absorpt_process_details
;
multi-scan from symmetry-related measurements 
 Sortav (Blessing 1995)
;
 
 
_exptl_special_details 
; 
 ? 
; 
 
_diffrn_ambient_temperature       150(1) 
_diffrn_radiation_wavelength      0.71073 
_diffrn_radiation_type            MoK\a 
_diffrn_radiation_source          'fine-focus sealed tube' 
_diffrn_radiation_monochromator   graphite 
_diffrn_measurement_device_type   'Nonius KappaCCD' 
_diffrn_measurement_method        '\f scans and \w scans with \k offsets' 
_diffrn_detector_area_resol_mean  9
_diffrn_reflns_number             17679
_diffrn_reflns_av_R_equivalents   0.087
_diffrn_reflns_av_sigmaI/netI     0.076  
_diffrn_reflns_limit_h_min        -24 
_diffrn_reflns_limit_h_max        24 
_diffrn_reflns_limit_k_min        -10 
_diffrn_reflns_limit_k_max        10 
_diffrn_reflns_limit_l_min        -25 
_diffrn_reflns_limit_l_max        25 
_diffrn_reflns_theta_min          2.65 
_diffrn_reflns_theta_max          25.14 
_reflns_number_total              6659 
_reflns_number_gt                 4314 
_reflns_threshold_expression      'I>2\s(I)'
 

_computing_data_collection        'Collect (Nonius B.V., 1997-2002)' 
_computing_cell_refinement        'Denzo-SMN (Otwinowski & Minor, 1997)' 
_computing_data_reduction         'Denzo-SMN' 
_computing_structure_solution     'SIR-92 (Altomare et al., 1994)' 
_computing_structure_refinement   'SHELXTL V6.1 (Sheldrick, 2008)' 
_computing_molecular_graphics     'PLATON (Spek, 2003)' 
_computing_publication_material   'SHELXTL V6.1'

_publ_section_references
;
Altomare, A., Cascarano, G., Giacovazzo, C., Guagliardi, A., 
Burla, M. C., Polidori, G. & Camalli, M. (1994). J. Appl. Cryst. 
27, 435.

Blessing, R. H. (1995). Acta Cryst. A51, 33-38.

Nonius B.V (1997-2002). Collect. Data collection software, Delft, 
The Netherlands. 

Otwinowski, Z. & Minor, W. (1997). Methods in Enzymology, Vol. 276,
Macromolecular Crystallography, Part A edited by C. W. Carter &
R. M. Sweet pp. 307-326. London: Academic press. 

Sheldrick, G. M. (2008). Acta Cryst. A64, 112-122.

Spek, A.L. (2003). J. Appl. Cryst. 36, 7-13.
;

 
_refine_special_details 
; 
 Refinement of F^2^ against ALL reflections.  The weighted R-factor wR and 
 goodness of fit S are based on F^2^, conventional R-factors R are based 
 on F, with F set to zero for negative F^2^. The threshold expression of 
 F^2^ > 2sigma(F^2^) is used only for calculating R-factors(gt) etc. and is 
 not relevant to the choice of reflections for refinement.  R-factors based 
 on F^2^ are statistically about twice as large as those based on F, and R- 
 factors based on ALL data will be even larger. 
; 
 
_refine_ls_structure_factor_coef  Fsqd  
_refine_ls_matrix_type            full 
_refine_ls_weighting_scheme       calc  
_refine_ls_weighting_details 
 'calc w=1/[\s^2^(Fo^2^)+(0.0913P)^2^+2.5627P] where P=(Fo^2^+2Fc^2^)/3' 
_atom_sites_solution_primary      direct 
_atom_sites_solution_secondary    difmap 
_atom_sites_solution_hydrogens    geom 
_refine_ls_hydrogen_treatment     constr 
_refine_ls_extinction_method      none 
_refine_ls_extinction_coef        ? 
_refine_ls_number_reflns          6659 
_refine_ls_number_parameters      514 
_refine_ls_number_restraints      0 
_refine_ls_R_factor_all           0.1167 
_refine_ls_R_factor_gt            0.0727 
_refine_ls_wR_factor_ref          0.2117 
_refine_ls_wR_factor_gt           0.1872 
_refine_ls_goodness_of_fit_ref    1.083 
_refine_ls_restrained_S_all       1.083 
_refine_ls_shift/su_max           0.000 
_refine_ls_shift/su_mean          0.000 
 
loop_ 
 _atom_site_label 
 _atom_site_type_symbol 
 _atom_site_fract_x 
 _atom_site_fract_y 
 _atom_site_fract_z 
 _atom_site_U_iso_or_equiv 
 _atom_site_adp_type 
 _atom_site_occupancy 
 _atom_site_symmetry_multiplicity 
 _atom_site_calc_flag 
 _atom_site_refinement_flags 
 _atom_site_disorder_assembly 
 _atom_site_disorder_group 
O1A O 0.51247(12) 0.5552(3) 0.30123(12) 0.0484(7) Uani 1 1 d . . . 
O2A O 0.42934(13) 0.7431(3) 0.36563(13) 0.0536(7) Uani 1 1 d . . . 
O3A O 0.42420(14) 0.9106(4) 0.65522(14) 0.0619(8) Uani 1 1 d . . . 
O4A O 0.72263(13) 0.6206(3) 0.33339(13) 0.0536(7) Uani 1 1 d . . . 
O5A O 0.71460(14) 0.5988(3) 0.62689(12) 0.0557(8) Uani 1 1 d . . . 
N1A N 0.61678(14) 0.5651(3) 0.33041(14) 0.0398(7) Uani 1 1 d . . . 
C1A C 0.55536(17) 0.6124(4) 0.34517(17) 0.0400(9) Uani 1 1 d . . . 
C2A C 0.54509(19) 0.4522(5) 0.25997(19) 0.0506(10) Uani 1 1 d . . . 
H2AA H 0.5261 0.4582 0.2162 0.061 Uiso 1 1 calc R . . 
H2AB H 0.5427 0.3454 0.2749 0.061 Uiso 1 1 calc R . . 
C3A C 0.61379(18) 0.5085(5) 0.26380(17) 0.0437(9) Uani 1 1 d . . . 
C4A C 0.6236(2) 0.6386(5) 0.2175(2) 0.0597(12) Uani 1 1 d . . . 
H4AA H 0.6676 0.6767 0.2234 0.090 Uiso 1 1 calc R . . 
H4AB H 0.5936 0.7216 0.2250 0.090 Uiso 1 1 calc R . . 
H4AC H 0.6160 0.6011 0.1742 0.090 Uiso 1 1 calc R . . 
C5A C 0.6606(2) 0.3776(5) 0.2555(2) 0.0560(11) Uani 1 1 d . . . 
H5AA H 0.7042 0.4180 0.2560 0.084 Uiso 1 1 calc R . . 
H5AB H 0.6500 0.3263 0.2152 0.084 Uiso 1 1 calc R . . 
H5AC H 0.6575 0.3044 0.2901 0.084 Uiso 1 1 calc R . . 
C6A C 0.53909(17) 0.7011(4) 0.39332(17) 0.0396(9) Uani 1 1 d . . . 
H6AA H 0.5727 0.7368 0.4216 0.048 Uiso 1 1 calc R . . 
C7A C 0.47426(19) 0.7471(4) 0.40581(18) 0.0422(9) Uani 1 1 d . . . 
C8A C 0.46302(17) 0.7956(4) 0.47146(18) 0.0412(9) Uani 1 1 d . . . 
C9A C 0.40855(19) 0.8816(4) 0.4827(2) 0.0467(10) Uani 1 1 d . . . 
H9AA H 0.3809 0.9124 0.4478 0.056 Uiso 1 1 calc R . . 
C10A C 0.3937(2) 0.9227(4) 0.5424(2) 0.0498(10) Uani 1 1 d . . . 
H10A H 0.3564 0.9814 0.5484 0.060 Uiso 1 1 calc R . . 
C11A C 0.4335(2) 0.8783(5) 0.5940(2) 0.0492(10) Uani 1 1 d . . . 
C12A C 0.48786(19) 0.7912(5) 0.58360(19) 0.0491(10) Uani 1 1 d . . . 
H12A H 0.5150 0.7580 0.6185 0.059 Uiso 1 1 calc R . . 
C13A C 0.50226(19) 0.7534(5) 0.52347(18) 0.0474(10) Uani 1 1 d . . . 
H13A H 0.5401 0.6969 0.5173 0.057 Uiso 1 1 calc R . . 
C14A C 0.3684(2) 0.9967(5) 0.6687(2) 0.0697(14) Uani 1 1 d . . . 
H14A H 0.3672 1.0105 0.7144 0.105 Uiso 1 1 calc R . . 
H14B H 0.3300 0.9416 0.6527 0.105 Uiso 1 1 calc R . . 
H14C H 0.3699 1.0968 0.6482 0.105 Uiso 1 1 calc R . . 
C15A C 0.67519(18) 0.5997(4) 0.36305(18) 0.0427(9) Uani 1 1 d . . . 
C16A C 0.67953(17) 0.6023(4) 0.43260(17) 0.0385(9) Uani 1 1 d . . . 
C17A C 0.64442(18) 0.5051(4) 0.46921(18) 0.0420(9) Uani 1 1 d . . . 
H17A H 0.6129 0.4402 0.4492 0.050 Uiso 1 1 calc R . . 
C18A C 0.65460(17) 0.5014(4) 0.53419(17) 0.0379(9) Uani 1 1 d . . . 
H18A H 0.6308 0.4332 0.5585 0.046 Uiso 1 1 calc R . . 
C19A C 0.69918(18) 0.5967(4) 0.56343(18) 0.0431(9) Uani 1 1 d . . . 
C20A C 0.7342(2) 0.6960(5) 0.52804(19) 0.0520(10) Uani 1 1 d . . . 
H20A H 0.7646 0.7627 0.5485 0.062 Uiso 1 1 calc R . . 
C21A C 0.72473(18) 0.6977(5) 0.46312(19) 0.0470(10) Uani 1 1 d . . . 
H21A H 0.7493 0.7647 0.4390 0.056 Uiso 1 1 calc R . . 
C22A C 0.6868(2) 0.4809(5) 0.66330(19) 0.0603(12) Uani 1 1 d . . . 
H22A H 0.7052 0.4850 0.7068 0.090 Uiso 1 1 calc R . . 
H22B H 0.6958 0.3810 0.6449 0.090 Uiso 1 1 calc R . . 
H22C H 0.6404 0.4962 0.6630 0.090 Uiso 1 1 calc R . . 
O1B O 0.00734(12) 0.9881(3) 0.69813(12) 0.0461(7) Uani 1 1 d . . . 
O2B O -0.07731(12) 0.8053(3) 0.62229(13) 0.0541(7) Uani 1 1 d . . . 
O3B O -0.06713(13) 0.5713(3) 0.34018(13) 0.0529(7) Uani 1 1 d . . . 
O4B O 0.21572(13) 0.8939(3) 0.70217(13) 0.0521(7) Uani 1 1 d . . . 
O5B O 0.21410(14) 0.8385(4) 0.40713(13) 0.0612(8) Uani 1 1 d . . . 
N1B N 0.11230(14) 0.9665(3) 0.68549(14) 0.0387(7) Uani 1 1 d . . . 
C1B C 0.05068(17) 0.9244(4) 0.66155(17) 0.0393(9) Uani 1 1 d . . . 
C2B C 0.04019(18) 1.0940(5) 0.74225(19) 0.0470(10) Uani 1 1 d . . . 
H2BA H 0.0201 1.0941 0.7832 0.056 Uiso 1 1 calc R . . 
H2BB H 0.0392 1.1991 0.7250 0.056 Uiso 1 1 calc R . . 
C3B C 0.10841(18) 1.0343(5) 0.74984(17) 0.0430(9) Uani 1 1 d . . . 
C4B C 0.1157(2) 0.9127(5) 0.80109(19) 0.0526(11) Uani 1 1 d . . . 
H4BA H 0.1597 0.8738 0.8035 0.079 Uiso 1 1 calc R . . 
H4BB H 0.0860 0.8285 0.7909 0.079 Uiso 1 1 calc R . . 
H4BC H 0.1062 0.9574 0.8418 0.079 Uiso 1 1 calc R . . 
C5B C 0.15602(19) 1.1639(5) 0.7611(2) 0.0512(10) Uani 1 1 d . . . 
H5BA H 0.1552 1.2299 0.7238 0.077 Uiso 1 1 calc R . . 
H5BB H 0.1991 1.1216 0.7691 0.077 Uiso 1 1 calc R . . 
H5BC H 0.1445 1.2238 0.7978 0.077 Uiso 1 1 calc R . . 
C6B C 0.03436(18) 0.8323(4) 0.61212(17) 0.0415(9) Uani 1 1 d . . . 
H6BA H 0.0683 0.7911 0.5897 0.050 Uiso 1 1 calc R . . 
C7B C -0.02965(18) 0.7909(5) 0.59027(18) 0.0440(9) Uani 1 1 d . . . 
C8B C -0.03846(17) 0.7260(4) 0.52537(17) 0.0410(9) Uani 1 1 d . . . 
C9B C -0.09037(18) 0.6317(4) 0.50909(18) 0.0444(10) Uani 1 1 d . . . 
H9BA H -0.1189 0.6049 0.5404 0.053 Uiso 1 1 calc R . . 
C10B C -0.10138(19) 0.5759(4) 0.44826(19) 0.0461(10) Uani 1 1 d . . . 
H10B H -0.1366 0.5097 0.4384 0.055 Uiso 1 1 calc R . . 
C11B C -0.06114(19) 0.6167(4) 0.40207(19) 0.0441(9) Uani 1 1 d . . . 
C12B C -0.00890(19) 0.7129(5) 0.41701(19) 0.0456(10) Uani 1 1 d . . . 
H12B H 0.0188 0.7423 0.3853 0.055 Uiso 1 1 calc R . . 
C13B C 0.00194(18) 0.7645(5) 0.47813(18) 0.0438(9) Uani 1 1 d . . . 
H13B H 0.0379 0.8279 0.4883 0.053 Uiso 1 1 calc R . . 
C14B C -0.1219(2) 0.4814(5) 0.3204(2) 0.0589(12) Uani 1 1 d . . . 
H14D H -0.1227 0.4655 0.2746 0.088 Uiso 1 1 calc R . . 
H14E H -0.1609 0.5350 0.3310 0.088 Uiso 1 1 calc R . . 
H14F H -0.1196 0.3823 0.3419 0.088 Uiso 1 1 calc R . . 
C15B C 0.17076(18) 0.9163(4) 0.66380(18) 0.0403(9) Uani 1 1 d . . . 
C16B C 0.17769(17) 0.8987(4) 0.59548(17) 0.0377(9) Uani 1 1 d . . . 
C17B C 0.15056(17) 0.9992(4) 0.55062(18) 0.0400(9) Uani 1 1 d . . . 
H17B H 0.1240 1.0798 0.5637 0.048 Uiso 1 1 calc R . . 
C18B C 0.16155(17) 0.9839(4) 0.48712(18) 0.0404(9) Uani 1 1 d . . . 
H18B H 0.1430 1.0537 0.4570 0.049 Uiso 1 1 calc R . . 
C19B C 0.19978(19) 0.8660(5) 0.46827(18) 0.0467(10) Uani 1 1 d . . . 
C20B C 0.2269(2) 0.7640(5) 0.5120(2) 0.0549(11) Uani 1 1 d . . . 
H20B H 0.2525 0.6821 0.4985 0.066 Uiso 1 1 calc R . . 
C21B C 0.21681(18) 0.7811(5) 0.5751(2) 0.0485(10) Uani 1 1 d . . . 
H21B H 0.2366 0.7126 0.6051 0.058 Uiso 1 1 calc R . . 
C22B C 0.1894(2) 0.9435(5) 0.3596(2) 0.0609(12) Uani 1 1 d . . . 
H22D H 0.2019 0.9097 0.3181 0.091 Uiso 1 1 calc R . . 
H22E H 0.2067 1.0457 0.3686 0.091 Uiso 1 1 calc R . . 
H22F H 0.1426 0.9466 0.3597 0.091 Uiso 1 1 calc R . . 
 
loop_ 
 _atom_site_aniso_label 
 _atom_site_aniso_U_11 
 _atom_site_aniso_U_22 
 _atom_site_aniso_U_33 
 _atom_site_aniso_U_23 
 _atom_site_aniso_U_13 
 _atom_site_aniso_U_12 
O1A 0.0413(15) 0.0611(17) 0.0426(15) -0.0081(13) 0.0011(12) 0.0002(13) 
O2A 0.0444(16) 0.073(2) 0.0429(16) 0.0028(14) 0.0008(14) 0.0024(14) 
O3A 0.066(2) 0.069(2) 0.0527(18) -0.0190(15) 0.0197(15) -0.0150(16) 
O4A 0.0440(16) 0.071(2) 0.0468(16) -0.0032(14) 0.0089(13) -0.0048(14) 
O5A 0.0602(18) 0.0665(19) 0.0399(16) -0.0036(14) -0.0001(14) -0.0145(15) 
N1A 0.0422(18) 0.0421(18) 0.0352(17) -0.0039(14) 0.0027(14) -0.0004(14) 
C1A 0.040(2) 0.042(2) 0.038(2) 0.0022(17) 0.0014(18) -0.0070(17) 
C2A 0.054(3) 0.053(2) 0.045(2) -0.012(2) 0.002(2) 0.002(2) 
C3A 0.046(2) 0.049(2) 0.035(2) -0.0083(17) 0.0007(17) 0.0059(18) 
C4A 0.066(3) 0.072(3) 0.042(2) 0.006(2) 0.009(2) 0.006(2) 
C5A 0.057(3) 0.056(3) 0.055(3) -0.015(2) 0.001(2) 0.008(2) 
C6A 0.038(2) 0.042(2) 0.039(2) 0.0005(17) 0.0044(17) -0.0021(17) 
C7A 0.046(2) 0.040(2) 0.041(2) 0.0047(17) 0.004(2) -0.0021(18) 
C8A 0.042(2) 0.038(2) 0.044(2) -0.0018(17) 0.0084(18) -0.0050(17) 
C9A 0.046(2) 0.043(2) 0.052(2) 0.0042(19) 0.0081(19) 0.0014(18) 
C10A 0.053(2) 0.041(2) 0.057(3) -0.004(2) 0.017(2) -0.0063(19) 
C11A 0.057(3) 0.045(2) 0.047(2) -0.0097(19) 0.017(2) -0.015(2) 
C12A 0.046(2) 0.059(3) 0.042(2) -0.0020(19) 0.0042(19) -0.002(2) 
C13A 0.042(2) 0.057(3) 0.043(2) -0.0041(19) 0.0056(19) -0.0018(19) 
C14A 0.083(3) 0.052(3) 0.079(3) -0.017(2) 0.044(3) -0.008(2) 
C15A 0.042(2) 0.040(2) 0.047(2) -0.0040(18) 0.0035(19) -0.0008(17) 
C16A 0.039(2) 0.034(2) 0.043(2) 0.0015(17) 0.0059(17) 0.0014(17) 
C17A 0.040(2) 0.038(2) 0.047(2) 0.0003(17) 0.0000(18) -0.0022(17) 
C18A 0.039(2) 0.033(2) 0.042(2) -0.0019(16) 0.0038(17) -0.0026(16) 
C19A 0.048(2) 0.043(2) 0.038(2) -0.0026(17) 0.0013(18) 0.0018(18) 
C20A 0.056(3) 0.052(2) 0.048(2) -0.006(2) 0.001(2) -0.018(2) 
C21A 0.044(2) 0.049(2) 0.048(2) 0.0006(19) -0.0004(19) -0.0089(19) 
C22A 0.067(3) 0.076(3) 0.037(2) 0.006(2) 0.003(2) -0.012(2) 
O1B 0.0444(15) 0.0538(17) 0.0407(15) -0.0042(13) 0.0073(12) 0.0017(13) 
O2B 0.0445(16) 0.075(2) 0.0433(16) 0.0019(14) 0.0089(13) -0.0025(14) 
O3B 0.0548(17) 0.0538(17) 0.0496(17) -0.0100(14) -0.0023(14) 0.0026(14) 
O4B 0.0466(16) 0.0592(18) 0.0499(16) -0.0047(14) -0.0028(14) 0.0069(14) 
O5B 0.067(2) 0.072(2) 0.0452(17) -0.0088(15) 0.0115(15) 0.0110(16) 
N1B 0.0374(17) 0.0411(17) 0.0379(17) -0.0016(14) 0.0048(14) 0.0014(14) 
C1B 0.039(2) 0.042(2) 0.038(2) 0.0040(17) 0.0091(17) 0.0048(17) 
C2B 0.049(2) 0.050(2) 0.043(2) -0.0073(19) 0.0103(19) 0.0020(19) 
C3B 0.049(2) 0.047(2) 0.033(2) -0.0011(17) 0.0062(18) 0.0030(19) 
C4B 0.058(3) 0.056(3) 0.043(2) 0.006(2) 0.004(2) -0.002(2) 
C5B 0.049(2) 0.052(3) 0.053(2) -0.008(2) 0.005(2) 0.002(2) 
C6B 0.042(2) 0.043(2) 0.039(2) 0.0026(18) 0.0052(17) 0.0022(18) 
C7B 0.045(2) 0.049(2) 0.038(2) 0.0076(18) 0.0050(19) 0.0018(18) 
C8B 0.040(2) 0.042(2) 0.041(2) 0.0046(17) 0.0030(17) 0.0025(17) 
C9B 0.042(2) 0.044(2) 0.047(2) 0.0085(18) 0.0037(18) -0.0013(18) 
C10B 0.043(2) 0.040(2) 0.055(3) 0.0018(19) 0.002(2) -0.0050(18) 
C11B 0.047(2) 0.038(2) 0.048(2) -0.0041(18) -0.0009(19) 0.0064(18) 
C12B 0.046(2) 0.049(2) 0.043(2) -0.0022(18) 0.0071(18) 0.0016(19) 
C13B 0.037(2) 0.049(2) 0.046(2) -0.0021(19) 0.0036(18) -0.0009(18) 
C14B 0.063(3) 0.046(3) 0.066(3) -0.006(2) -0.015(2) 0.002(2) 
C15B 0.041(2) 0.034(2) 0.046(2) -0.0033(17) 0.0005(19) 0.0032(17) 
C16B 0.035(2) 0.037(2) 0.042(2) -0.0007(17) 0.0038(17) -0.0016(16) 
C17B 0.042(2) 0.032(2) 0.047(2) -0.0004(17) 0.0081(18) 0.0016(16) 
C18B 0.043(2) 0.036(2) 0.043(2) -0.0015(17) 0.0041(18) -0.0039(17) 
C19B 0.047(2) 0.052(2) 0.042(2) -0.0063(19) 0.0065(19) -0.0010(19) 
C20B 0.053(2) 0.059(3) 0.053(3) -0.010(2) 0.005(2) 0.017(2) 
C21B 0.047(2) 0.047(2) 0.052(3) 0.0007(19) -0.0014(19) 0.0112(19) 
C22B 0.081(3) 0.058(3) 0.043(2) -0.004(2) 0.003(2) -0.007(2) 
 
_geom_special_details 
; 
 All esds (except the esd in the dihedral angle between two l.s. planes) 
 are estimated using the full covariance matrix.  The cell esds are taken 
 into account individually in the estimation of esds in distances, angles 
 and torsion angles; correlations between esds in cell parameters are only 
 used when they are defined by crystal symmetry.  An approximate (isotropic) 
 treatment of cell esds is used for estimating esds involving l.s. planes. 
; 
 
loop_ 
 _geom_bond_atom_site_label_1 
 _geom_bond_atom_site_label_2 
 _geom_bond_distance 
 _geom_bond_site_symmetry_2 
 _geom_bond_publ_flag 
O1A C1A 1.351(4) . ? 
O1A C2A 1.456(5) . ? 
O2A C7A 1.231(4) . ? 
O3A C11A 1.357(5) . ? 
O3A C14A 1.434(5) . ? 
O4A C15A 1.222(4) . ? 
O5A C19A 1.366(5) . ? 
O5A C22A 1.434(5) . ? 
N1A C15A 1.401(5) . ? 
N1A C1A 1.405(5) . ? 
N1A C3A 1.496(5) . ? 
C1A C6A 1.344(5) . ? 
C2A C3A 1.518(6) . ? 
C3A C5A 1.524(5) . ? 
C3A C4A 1.527(6) . ? 
C6A C7A 1.456(5) . ? 
C7A C8A 1.489(5) . ? 
C8A C13A 1.385(6) . ? 
C8A C9A 1.399(5) . ? 
C9A C10A 1.371(6) . ? 
C10A C11A 1.391(6) . ? 
C11A C12A 1.398(6) . ? 
C12A C13A 1.370(6) . ? 
C15A C16A 1.474(5) . ? 
C16A C21A 1.392(5) . ? 
C16A C17A 1.392(5) . ? 
C17A C18A 1.383(5) . ? 
C18A C19A 1.372(5) . ? 
C19A C20A 1.387(6) . ? 
C20A C21A 1.380(6) . ? 
O1B C1B 1.351(4) . ? 
O1B C2B 1.459(5) . ? 
O2B C7B 1.248(4) . ? 
O3B C11B 1.371(5) . ? 
O3B C14B 1.433(5) . ? 
O4B C15B 1.222(4) . ? 
O5B C19B 1.371(5) . ? 
O5B C22B 1.437(5) . ? 
N1B C15B 1.405(5) . ? 
N1B C1B 1.407(5) . ? 
N1B C3B 1.496(5) . ? 
C1B C6B 1.350(5) . ? 
C2B C3B 1.520(5) . ? 
C3B C5B 1.519(6) . ? 
C3B C4B 1.523(5) . ? 
C6B C7B 1.438(5) . ? 
C7B C8B 1.491(5) . ? 
C8B C9B 1.391(5) . ? 
C8B C13B 1.393(5) . ? 
C9B C10B 1.387(5) . ? 
C10B C11B 1.379(5) . ? 
C11B C12B 1.401(6) . ? 
C12B C13B 1.379(5) . ? 
C15B C16B 1.475(5) . ? 
C16B C17B 1.392(5) . ? 
C16B C21B 1.400(5) . ? 
C17B C18B 1.388(5) . ? 
C18B C19B 1.380(5) . ? 
C19B C20B 1.384(6) . ? 
C20B C21B 1.378(6) . ? 
 
loop_ 
 _geom_angle_atom_site_label_1 
 _geom_angle_atom_site_label_2 
 _geom_angle_atom_site_label_3 
 _geom_angle 
 _geom_angle_site_symmetry_1 
 _geom_angle_site_symmetry_3 
 _geom_angle_publ_flag 
C1A O1A C2A 109.2(3) . . ? 
C11A O3A C14A 117.9(4) . . ? 
C19A O5A C22A 116.3(3) . . ? 
C15A N1A C1A 127.5(3) . . ? 
C15A N1A C3A 121.6(3) . . ? 
C1A N1A C3A 108.8(3) . . ? 
C6A C1A O1A 123.4(3) . . ? 
C6A C1A N1A 128.2(3) . . ? 
O1A C1A N1A 108.4(3) . . ? 
O1A C2A C3A 104.2(3) . . ? 
N1A C3A C2A 98.2(3) . . ? 
N1A C3A C5A 111.6(3) . . ? 
C2A C3A C5A 111.3(3) . . ? 
N1A C3A C4A 111.3(3) . . ? 
C2A C3A C4A 111.9(3) . . ? 
C5A C3A C4A 111.9(3) . . ? 
C1A C6A C7A 125.5(4) . . ? 
O2A C7A C6A 123.2(4) . . ? 
O2A C7A C8A 119.9(3) . . ? 
C6A C7A C8A 116.9(3) . . ? 
C13A C8A C9A 117.2(4) . . ? 
C13A C8A C7A 123.3(4) . . ? 
C9A C8A C7A 119.3(4) . . ? 
C10A C9A C8A 122.1(4) . . ? 
C9A C10A C11A 119.7(4) . . ? 
O3A C11A C10A 125.6(4) . . ? 
O3A C11A C12A 115.6(4) . . ? 
C10A C11A C12A 118.9(4) . . ? 
C13A C12A C11A 120.4(4) . . ? 
C12A C13A C8A 121.6(4) . . ? 
O4A C15A N1A 119.4(3) . . ? 
O4A C15A C16A 120.8(3) . . ? 
N1A C15A C16A 119.8(3) . . ? 
C21A C16A C17A 118.3(3) . . ? 
C21A C16A C15A 118.3(3) . . ? 
C17A C16A C15A 123.2(3) . . ? 
C18A C17A C16A 121.1(3) . . ? 
C19A C18A C17A 119.7(3) . . ? 
O5A C19A C18A 124.6(4) . . ? 
O5A C19A C20A 115.2(3) . . ? 
C18A C19A C20A 120.2(4) . . ? 
C21A C20A C19A 120.0(4) . . ? 
C20A C21A C16A 120.6(4) . . ? 
C1B O1B C2B 108.9(3) . . ? 
C11B O3B C14B 117.7(3) . . ? 
C19B O5B C22B 117.5(3) . . ? 
C15B N1B C1B 126.7(3) . . ? 
C15B N1B C3B 121.4(3) . . ? 
C1B N1B C3B 109.5(3) . . ? 
C6B C1B O1B 123.1(3) . . ? 
C6B C1B N1B 128.3(3) . . ? 
O1B C1B N1B 108.5(3) . . ? 
O1B C2B C3B 104.6(3) . . ? 
N1B C3B C5B 111.6(3) . . ? 
N1B C3B C2B 98.2(3) . . ? 
C5B C3B C2B 111.3(3) . . ? 
N1B C3B C4B 111.5(3) . . ? 
C5B C3B C4B 111.9(3) . . ? 
C2B C3B C4B 111.6(3) . . ? 
C1B C6B C7B 126.0(4) . . ? 
O2B C7B C6B 124.0(4) . . ? 
O2B C7B C8B 119.0(4) . . ? 
C6B C7B C8B 117.0(3) . . ? 
C9B C8B C13B 117.7(4) . . ? 
C9B C8B C7B 120.4(3) . . ? 
C13B C8B C7B 121.8(4) . . ? 
C10B C9B C8B 121.5(4) . . ? 
C11B C10B C9B 119.8(4) . . ? 
O3B C11B C10B 125.7(4) . . ? 
O3B C11B C12B 114.5(3) . . ? 
C10B C11B C12B 119.8(4) . . ? 
C13B C12B C11B 119.4(4) . . ? 
C12B C13B C8B 121.8(4) . . ? 
O4B C15B N1B 118.9(3) . . ? 
O4B C15B C16B 121.4(3) . . ? 
N1B C15B C16B 119.7(3) . . ? 
C17B C16B C21B 118.4(3) . . ? 
C17B C16B C15B 123.1(3) . . ? 
C21B C16B C15B 118.4(3) . . ? 
C18B C17B C16B 121.2(3) . . ? 
C19B C18B C17B 119.2(4) . . ? 
O5B C19B C18B 124.8(4) . . ? 
O5B C19B C20B 114.7(4) . . ? 
C18B C19B C20B 120.6(4) . . ? 
C21B C20B C19B 120.1(4) . . ? 
C20B C21B C16B 120.5(4) . . ? 
 
_diffrn_measured_fraction_theta_max    0.957 
_diffrn_reflns_theta_full              25.00 
_diffrn_measured_fraction_theta_full   0.964 
_refine_diff_density_max    0.235 
_refine_diff_density_min   -0.286 
_refine_diff_density_rms    0.059 
